# Supplementary material for: An experimental and theoretical dissection of potassium cation/glycine interactionsElectronic supplementary information (ESI) available: Fig. S1 shows a complete set of figures for collision-induced dissociation of six potassiated complexes with Xe. Table S1 lists vibrational frequencies and average vibrational energies at 298 K of the neutral molecules and potassiated complexes determined from vibrational analysis at the MP2(full)/6-31G(d) level. Table S2 lists rotational constants for the potassiated complexes and products for all seven K+(L) systems calculated at the same level of theory. Tables S3, S4, and S5 contain Cartesian coordinates for the neutral ligands and potassiated complexes calculated at the MP2(full)/6-31G(d), MP2(full)/6-31+G(d,p), and B3LYP/aug-cc-pVDZ levels. See http://www.rsc.org/suppdata/cp/b3/b315642g/
Source: Royal Society of Chemistry journal article supplement (doi:10.1039/b315642g), 2004-01-01
Supplement: b315624g.doc [file b315624g.doc]

**Supplementary Information**

Figure S1 shows a complete set of figures for collision-induced dissociation of six potassiated complexes with Xe. Table S1 lists vibrational frequencies and average vibrational energies at 298 K of the neutral molecules and potassiated complexes determined from vibrational analysis at the MP2(full)/6-31G(d) level. Table S2 lists rotational constants for the potassiated complexes and products for all seven K+(L) systems calculated at the same level of theory. Tables S3, S4, and S5 contain Cartesian coordinates for the neutral ligands and potassiated complexes calculated at the MP2(full)/6-31G(d), MP2(full)/6-31+G(d,p),and B3LYP/aug-cc-pVDZ levels, respectively.

**Figure S1.** Zero pressure extrapolated cross sections for collision-induced dissociation of K+(L) where L = 1-propylamine (PAM), 1-propanol (POH), propionic acid (PPA), methyl ethyl ketone (MEK), glycine (GLY), and ethanol amine (EAM) (parts a-f, respectively) with Xe in the threshold region as a function of kinetic energy in the center-of-mass frame (lower x-axis) and the laboratory frame (upper x-axis). Solid lines show the best fit to the data using the model of eq 1 convoluted over the neutral and ion kinetic and internal energy distributions. Dotted lines show the model cross sections in the absence of experimental kinetic energy broadening for reactions with an internal energy of 0 K.

#### Table S1. Vibrational Frequenciesa and Average Vibrational Energies at 298 K

| species | Evib, eV | frequencies, cm-1 |
| --- | --- | --- |
| POH |  | 129, 237, 272, 292, 452, 762, 891, 901, 1045, 1069, 1094, 1184, 1251, 1263, 1313, 1341, 1422, 1455, 1504, 1512, 1517, 1538, 2938, 2980, 2995, 3011, 3059, 3080, 3086, 3642 |
| K+(POH) | 0.130 | 63, 73, 142, 194, 240, 300, 377, 454, 777, 897, 903, 1012, 1063, 1090, 1181, 1267, 1272, 1308, 1332, 1427, 1444, 1504, 1509, 1516, 1529, 2961, 2998, 3010, 3011, 3059, 3098, 3104, 3631 |
| PPA |  | 52, 213, 248, 456, 510, 596, 658, 806, 812, 1009, 1083, 1107, 1156, 1274, 1293, 1406, 1427, 1475, 1504, 1509, 1782, 3007, 3013, 3052, 3099, 3108, 3562 |
| K+(PPA) | 0.145 | 37, 57, 77, 178, 237, 260, 473, 522, 598, 671, 809, 829, 1017, 1089, 1112, 1182, 1281, 1310, 1419, 1444, 1464, 1507, 1511, 1738, 3004, 3015, 3058, 3088, 3105, 3558 |
| PAM |  | 124, 224, 248, 278, 433, 727, 829, 845, 892, 998, 1013, 1055, 1122, 1196, 1244, 1275, 1301, 1370, 1378, 1448, 1457, 1460, 1473, 1602, 2813, 2881, 2887, 2915, 2942, 2969, 2973, 3264, 3358 |
| K+(PAM) | 0.129 | 73, 93, 145, 235, 284, 308, 394, 499, 767, 848, 900, 972, 1040, 1053, 1109, 1162, 1235, 1304, 1325, 1380, 1409, 1425, 1494, 1507, 1520, 1527, 1658, 2971, 2988, 3000, 3037, 3043, 3064, 3090, 3351, 3432 |
| MEK |  | 36, 106, 212, 249, 396, 461, 579, 758, 764, 946, 951, 1000, 1105, 1129, 1191, 1277, 1372, 1397, 1423, 1469, 1478, 1484, 1504, 1507, 1725, 2979, 2997, 3012, 3021, 3075, 3098, 3107, 3119 |
| K+(MEK) | 0.164 | 33, 45, 70, 103, 173, 232, 264, 408, 467, 581, 751, 782, 950, 963, 1008, 1103, 1132, 1208, 1279, 1384, 1408, 1421, 1456, 1469, 1476, 1507, 1509, 1711, 2988, 3003, 3008, 3029, 3082, 3092, 3104, 3123 |
| GLY |  | 66, 239, 255, 455, 504, 620, 659, 829, 912, 958, 1125, 1162, 1171, 1297, 1374, 1401, 1469, 1678, 1787, 3012, 3063, 3399, 3489, 3560 |
| K+(GLY) | 0.127 | 64, 82, 90, 176, 308, 354, 516, 537, 648, 839, 915, 949, 991, 1075, 1167, 1221, 1324, 1344, 1432, 1466, 1664, 1779, 2970, 3026, 3082, 3437, 3525 |
| AMP |  | 18, 94, 211, 255, 395, 461, 600, 787, 818, 950, 969, 1013, 1145, 1178, 1198, 1365, 1376, 1394, 1464, 1477, 1484, 1678, 1728, 2983, 2998, 3031, 3076, 3120, 3392, 3480 |
| K+(AMP) | 0.146 | 68, 102, 121, 159, 177, 267, 363, 431, 470, 608, 786, 845, 967, 1011, 1072, 1097, 1181, 1213, 1333, 1399, 1416, 1467, 1475, 1480, 1663, 1728, 2979, 3000, 3031, 3079, 3129, 3377, 3462 |
| EAM |  | 133, 239, 258, 280, 454, 781, 857, 933, 1023, 1043, 1064, 1149, 1184, 1250, 1270, 1332, 1412, 1468, 1483, 1606, 2843, 2852, 2905, 2950, 3276, 3369, 3524 |
| K+(EAM) | 0.116 | 75, 159, 197, 245, 328, 339, 393, 523, 860, 869, 1006, 1032, 1071, 1122, 1199, 1250, 1311, 1331, 1409, 1459, 1509, 1520, 1662, 2985, 2990, 3051, 3062, 3366, 3449, 3641 |

a Calculated at the MP2(full)/6-31G(d) level.

**Table S2.** Rotational Constants of K+(L) in cm-1 a

|  | Energized molecule | |  | Transition state | |
| --- | --- | --- | --- | --- | --- |
| ligand | 1-D | 2-D |  | 1-D | 2-D |
| POH | 0.205 | 0.044 |  | 0.886 | 0.123 |
| PPA | 0.242 | 0.035 |  | 0.335 | 0.111 |
| PAM | 0.165 | 0.530 |  | 0.842 | 0.121 |
| MEK | 0.120 | 0.035 |  | 0.317 | 0.105 |
| GLY | 0.151 | 0.043 |  | 0.341 | 0.112 |
| AMP | 0.147 | 0.147 |  | 0.323 | 0.107 |
| EAM | 0.170 | 0.063 |  | 0.957 | 0.127 |

a Geometries calculated at the MP2(full)/6-31G(d) level.

**Table S3.** Cartesian coordinates for MP2(full)/6-31G(d) optimized structures

| **Ligand** | **Atom** | **X** | **Y** | **Z** | **Complex** | **Atom** | **X** | **Y** | **Z** |
| --- | --- | --- | --- | --- | --- | --- | --- | --- | --- |
| **PAM** | C | -0.68354 | 0.32993 | -1.76412 | **K+(PAM)** | C | 2.85731 | 0.62205 | -0.00308 |
|  | C | -0.61365 | 0.35762 | -0.24168 | **M1** | C | 1.38922 | 0.44695 | 0.37106 |
|  | C | 0.62704 | -0.33612 | 0.29866 |  | C | 0.46319 | 1.23579 | -0.54105 |
|  | N | 0.66491 | -0.24008 | 1.76044 |  | N | -0.95488 | 1.08969 | -0.11966 |
|  | H | 0.18278 | 0.83339 | -2.20344 |  | H | 3.04281 | 0.29716 | -1.03034 |
|  | H | -1.58266 | 0.83267 | -2.12986 |  | H | 3.50216 | 0.03835 | 0.65687 |
|  | H | -0.69881 | -0.69761 | -2.13978 |  | H | 3.15542 | 1.67005 | 0.07921 |
|  | H | -1.50479 | -0.12710 | 0.17729 |  | H | 1.23239 | 0.76457 | 1.40954 |
|  | H | -0.61668 | 1.38817 | 0.12624 |  | H | 1.12969 | -0.62115 | 0.32354 |
|  | H | 1.51856 | 0.16813 | -0.09048 |  | H | 0.54715 | 0.86602 | -1.56823 |
|  | H | 0.65672 | -1.37105 | -0.08345 |  | H | 0.77534 | 2.28717 | -0.55267 |
|  | H | 1.51704 | -0.67313 | 2.11311 |  | H | -1.53587 | 1.62571 | -0.76888 |
|  | H | -0.10564 | -0.78150 | 2.15012 |  | H | -1.06153 | 1.58242 | 0.77066 |
|  |  |  |  |  |  | K | -1.70325 | -1.57720 | 0.13454 |

| **Ligand** | **Atom** | **X** | **Y** | **Z** | **Complex** | **Atom** | **X** | **Y** | **Z** |
| --- | --- | --- | --- | --- | --- | --- | --- | --- | --- |
| **K+(PAM)** | C | -1.74965 | 0.55334 | -0.21276 | **K+(PAM)** | C | -1.77863 | -1.01261 | -2.66548 |
| **M2** | C | -0.90623 | 1.80258 | 0.01977 | **M3** | C | -1.78099 | -0.82692 | -1.15166 |
|  | C | 0.45351 | 1.54067 | 0.64903 |  | C | -0.46512 | -0.25774 | -0.64038 |
|  | N | 1.27578 | 0.61652 | -0.17747 |  | N | -0.40623 | -0.05361 | 0.83191 |
|  | H | -1.44909 | 2.48760 | 0.67844 |  | H | -1.62034 | -0.06005 | -3.17866 |
|  | H | -0.77203 | 2.33651 | -0.92857 |  | H | -2.73125 | -1.42127 | -3.00799 |
|  | H | 0.32333 | 1.07914 | 1.63483 |  | H | -0.98874 | -1.70201 | -2.97628 |
|  | H | 0.96405 | 2.49740 | 0.80937 |  | H | -1.96922 | -1.78796 | -0.65783 |
|  | H | -1.34844 | -0.05604 | -1.02965 |  | H | -2.59723 | -0.15534 | -0.85907 |
|  | H | -2.76987 | 0.81739 | -0.49874 |  | H | -0.27053 | 0.70939 | -1.11786 |
|  | H | -1.81970 | -0.04791 | 0.70280 |  | H | 0.35856 | -0.92605 | -0.91628 |
|  | H | 2.23454 | 0.65589 | 0.17750 |  | H | -0.62468 | -0.95108 | 1.27260 |
|  | H | 1.34553 | 1.02403 | -1.11378 |  | H | -1.19860 | 0.54103 | 1.08867 |
|  | K | 0.39871 | -2.02575 | -0.10137 |  | K | 2.03337 | 0.98486 | 1.64602 |

| **Ligand** | **Atom** | **X** | **Y** | **Z** | **Complex** | **Atom** | **X** | **Y** | **Z** |
| --- | --- | --- | --- | --- | --- | --- | --- | --- | --- |
| **POH** | C | -1.51970 | 0.11971 | -0.52071 | **K+(POH)** | C | 0.00412 | -0.17948 | -2.86470 |
|  | C | -0.27957 | -0.76469 | -0.48800 | **M1** | C | -0.03425 | -0.13889 | -1.33910 |
|  | C | 0.69294 | -0.36208 | 0.60150 |  | C | 0.72370 | 1.04922 | -0.78815 |
|  | O | 1.12530 | 0.96946 | 0.31939 |  | O | 0.64019 | 1.01617 | 0.66013 |
|  | H | -1.23998 | 1.16060 | -0.68859 |  | H | 0.40943 | -1.06157 | -0.94084 |
|  | H | -2.06198 | 0.06224 | 0.42832 |  | H | -1.07902 | -0.08258 | -1.00432 |
|  | H | -2.20272 | -0.18871 | -1.31672 |  | H | 0.28833 | 1.98363 | -1.15784 |
|  | H | 0.24453 | -0.71494 | -1.44817 |  | H | 1.77425 | 1.00632 | -1.09447 |
|  | H | -0.56160 | -1.81235 | -0.32960 |  | H | 1.03232 | -0.25183 | -3.22708 |
|  | H | 1.54681 | -1.05461 | 0.62165 |  | H | -0.44610 | 0.72056 | -3.29013 |
|  | H | 0.19596 | -0.41387 | 1.58204 |  | H | -0.54686 | -1.04182 | -3.24441 |
|  | H | 1.71455 | 1.24834 | 1.03921 |  | H | 1.13249 | 1.78644 | 0.99567 |
|  |  |  |  |  |  | K | -0.62357 | -0.81966 | 1.98074 |

| **Ligand** | **Atom** | **X** | **Y** | **Z** | **Complex** | **Atom** | **X** | **Y** | **Z** |
| --- | --- | --- | --- | --- | --- | --- | --- | --- | --- |
| **K+(POH)** | C | -1.53529 | 0.91661 | 0.97895 | **K+(POH)** | C | -3.23378 | -0.88186 | -0.59060 |
| **M2** | C | -1.46979 | 0.63762 | -0.51999 | **M3** | C | -1.79928 | -1.26237 | -0.23593 |
|  | C | -1.30888 | -0.82806 | -0.86107 |  | C | -0.89144 | -0.05094 | -0.18686 |
|  | O | -0.00373 | -1.26849 | -0.39899 |  | O | 0.48165 | -0.40959 | 0.15210 |
|  | H | -0.65597 | 0.54503 | 1.51537 |  | H | -3.28296 | -0.40240 | -1.57161 |
|  | H | -2.40144 | 0.41982 | 1.42263 |  | H | -3.65320 | -0.19472 | 0.14872 |
|  | H | -1.62942 | 1.98662 | 1.17752 |  | H | -3.86847 | -1.76915 | -0.62008 |
|  | H | -0.66285 | 1.20787 | -1.00212 |  | H | -1.40752 | -1.96822 | -0.97793 |
|  | H | -2.39211 | 0.99032 | -0.99271 |  | H | -1.77727 | -1.76072 | 0.74049 |
|  | H | -1.38020 | -0.98737 | -1.94188 |  | H | -1.24164 | 0.66028 | 0.56807 |
|  | H | -2.08575 | -1.42010 | -0.36598 |  | H | -0.87004 | 0.45184 | -1.15906 |
|  | H | 0.02600 | -2.23527 | -0.50990 |  | H | 0.49751 | -1.37516 | 0.26968 |
|  | K | 1.95239 | 0.27810 | 0.33167 |  | K | 2.48934 | 1.20032 | 0.39291 |

| **Ligand** | **Atom** | **X** | **Y** | **Z** | **Complex** | **Atom** | **X** | **Y** | **Z** |
| --- | --- | --- | --- | --- | --- | --- | --- | --- | --- |
| **PPA** | C | 1.00990 | 0.03478 | -1.68051 | **K+(PPA)** | C | -2.97837 | 0.56404 | -0.05077 |
|  | C | 0.99891 | 0.06969 | -0.15920 | **M1** | C | -0.61879 | -0.29854 | 0.08282 |
|  | C | -0.39458 | -0.01946 | 0.40598 |  | C | -2.07682 | -0.63681 | 0.19507 |
|  | O | -0.37769 | 0.01359 | 1.76789 |  | O | -0.14966 | 0.79858 | -0.17333 |
|  | O | -1.42721 | -0.11028 | -0.23532 |  | O | 0.27720 | -1.31802 | 0.28726 |
|  | H | 0.43491 | 0.86684 | -2.09127 |  | H | -4.02325 | 0.26413 | 0.04269 |
|  | H | 0.56409 | -0.89064 | -2.05001 |  | H | -2.24529 | -1.06026 | 1.19360 |
|  | H | 1.45404 | 0.98837 | 0.22736 |  | H | -2.28849 | -1.44328 | -0.51876 |
|  | H | 1.58210 | -0.75354 | 0.26827 |  | H | -0.17796 | -2.16009 | 0.48555 |
|  | H | -1.31598 | -0.04891 | 2.04159 |  | H | -2.82301 | 0.96927 | -1.05144 |
|  | H | 2.03469 | 0.10133 | -2.05414 |  | H | -2.77944 | 1.35506 | 0.67337 |
|  |  |  |  |  |  | K | 2.49268 | 0.44519 | -0.16311 |

| **Ligand** | **Atom** | **X** | **Y** | **Z** | **Complex** | **Atom** | **X** | **Y** | **Z** |
| --- | --- | --- | --- | --- | --- | --- | --- | --- | --- |
| **K+(PPA)** | C | -2.21204 | -0.00019 | 0.11005 | **K+(PPA)** | C | 2.18628 | -2.02410 | 0.25939 |
| **M2** | C | 0.02048 | -0.64361 | 1.09567 | **M3** | C | 0.11346 | -0.81140 | -0.48297 |
|  | C | -1.47077 | -0.68769 | 1.24461 |  | C | 1.60426 | -0.89482 | -0.59704 |
|  | O | 0.63032 | -0.11395 | 0.16280 |  | O | -0.52390 | 0.17068 | -0.08854 |
|  | O | 0.64609 | -1.25302 | 2.10221 |  | O | -0.48897 | -1.94217 | -0.85279 |
|  | H | -3.28901 | -0.06472 | 0.27332 |  | H | 3.27357 | -2.02980 | 0.16735 |
|  | H | -1.99333 | -0.47638 | -0.84924 |  | H | 1.80668 | -2.99298 | -0.06584 |
|  | H | -1.94870 | 1.05911 | 0.05205 |  | H | 1.93630 | -1.88691 | 1.31416 |
|  | H | -1.71327 | -0.23888 | 2.21387 |  | H | 2.01420 | 0.07565 | -0.31082 |
|  | H | -1.75697 | -1.74132 | 1.33200 |  | H | 1.84497 | -1.06804 | -1.65124 |
|  | H | 1.61265 | -1.19275 | 1.95129 |  | H | -1.45710 | -1.82839 | -0.74907 |
|  | K | 1.09744 | 1.13577 | -1.98923 |  | K | -1.30209 | 2.43602 | 0.72368 |

| **Ligand** | **Atom** | **X** | **Y** | **Z** | **Complex** | **Atom** | **X** | **Y** | **Z** |
| --- | --- | --- | --- | --- | --- | --- | --- | --- | --- |
| **MEK** | C | 1.10167 | 0.00040 | -1.67293 | **K+(MEK)** | C | -0.07711 | -1.52256 | -1.79808 |
|  | C | 1.00961 | 0.00140 | -0.15588 |  | C | 1.06441 | 0.33656 | -0.49371 |
|  | C | -0.41853 | -0.00031 | 0.35286 |  | C | 1.09812 | -0.56449 | -1.69877 |
|  | C | -0.60381 | 0.00014 | 1.85356 |  | C | 2.23833 | 1.24353 | -0.26886 |
|  | O | -1.37636 | -0.00198 | -0.41447 |  | O | 0.10754 | 0.32300 | 0.29255 |
|  | H | 2.14549 | 0.00172 | -1.99627 |  | H | 0.01636 | -2.14505 | -2.68967 |
|  | H | 0.60667 | 0.87909 | -2.08995 |  | H | 2.05332 | -1.10474 | -1.68229 |
|  | H | 0.60929 | -0.88037 | -2.08865 |  | H | 1.15617 | 0.08216 | -2.58442 |
|  | H | 1.51918 | 0.87500 | 0.27173 |  | H | 2.02652 | 1.95195 | 0.53194 |
|  | H | 1.52178 | -0.87003 | 0.27305 |  | H | -1.02195 | -0.97841 | -1.86757 |
|  | H | -1.66824 | -0.00064 | 2.08888 |  | H | 2.49381 | 1.77961 | -1.18680 |
|  | H | -0.12919 | 0.88187 | 2.29536 |  | H | 3.11186 | 0.64145 | 0.00335 |
|  | H | -0.12781 | -0.88053 | 2.29598 |  | H | -0.11840 | -2.18479 | -0.92984 |
|  |  |  |  |  |  | K | -1.92213 | 0.12713 | 1.76955 |

| **Ligand** | **Atom** | **X** | **Y** | **Z** | **Complex** | **Atom** | **X** | **Y** | **Z** |
| --- | --- | --- | --- | --- | --- | --- | --- | --- | --- |
| **AMP** | C | -0.11004 | -0.15732 | 0.49033 | **K+(AMP)** | C | 1.26355 | -0.05097 | 0.30309 |
|  | C | 0.29296 | -0.20679 | -0.97864 | **M1** | C | 0.75199 | 1.37566 | 0.40230 |
|  | C | -0.12531 | -1.46780 | 1.24007 |  | C | 2.73545 | -0.25280 | 0.49697 |
|  | N | 0.29792 | 1.07070 | -1.66974 |  | N | -0.71472 | 1.43690 | 0.49040 |
|  | O | -0.40547 | 0.90696 | 1.02574 |  | O | 0.49752 | -0.98868 | 0.07240 |
|  | H | -0.62768 | 1.48717 | -1.57636 |  | H | -0.98187 | 1.28689 | 1.46495 |
|  | H | 0.91231 | 1.70563 | -1.16152 |  | H | 1.07643 | 1.89108 | -0.51037 |
|  | H | -0.38157 | -0.89816 | -1.49995 |  | H | 1.26789 | 1.87824 | 1.23173 |
|  | H | 1.28965 | -0.66101 | -1.04953 |  | H | 3.02675 | -1.23837 | 0.13492 |
|  | H | -0.81826 | -2.16988 | 0.76578 |  | H | 2.96821 | -0.18358 | 1.56536 |
|  | H | -0.42890 | -1.29375 | 2.27247 |  | H | 3.31226 | 0.52464 | -0.01174 |
|  | H | 0.86712 | -1.92906 | 1.22086 |  | H | -1.00715 | 2.39350 | 0.28707 |

| **Ligand** | **Atom** | **X** | **Y** | **Z** |
| --- | --- | --- | --- | --- |
| **K+(AMP)** | C | 2.18628 | -2.02410 | 0.25939 |
| **M2** | C | 0.11346 | -0.81140 | -0.48297 |
|  | C | 1.60426 | -0.89482 | -0.59704 |
|  | O | -0.52390 | 0.17068 | -0.08854 |
|  | O | -0.48897 | -1.94217 | -0.85279 |
|  | H | 3.27357 | -2.02980 | 0.16735 |
|  | H | 1.80668 | -2.99298 | -0.06584 |
|  | H | 1.93630 | -1.88691 | 1.31416 |
|  | H | 2.01420 | 0.07565 | -0.31082 |
|  | H | 1.84497 | -1.06804 | -1.65124 |
|  | H | -1.45710 | -1.82839 | -0.74907 |
|  | K | -1.30209 | 2.43602 | 0.72368 |

| **Ligand** | **Atom** | **X** | **Y** | **Z** | **Complex** | **Atom** | **X** | **Y** | **Z** |
| --- | --- | --- | --- | --- | --- | --- | --- | --- | --- |
| **EAM** | C | -0.61123 | -0.12832 | -0.71710 | **K+(EAM)** | C | -0.69208 | -0.74350 | -0.31384 |
|  | C | 0.88607 | -0.06227 | -0.46115 | **M1** | C | 0.56044 | -0.59964 | 0.52042 |
|  | N | -1.25877 | -0.50436 | 0.54655 |  | N | -1.45091 | 0.52907 | -0.35042 |
|  | O | 1.15643 | 0.81939 | 0.61369 |  | O | 1.37000 | 0.45352 | -0.05464 |
|  | H | -0.83236 | -0.80274 | -1.55797 |  | H | -1.28441 | -1.57471 | 0.08723 |
|  | H | -0.96029 | 0.87257 | -0.98528 |  | H | -0.41097 | -0.99971 | -1.33879 |
|  | H | 1.41569 | 0.31562 | -1.34005 |  | H | 1.11466 | -1.54227 | 0.50980 |
|  | H | 1.26641 | -1.07603 | -0.25169 |  | H | 0.31516 | -0.34918 | 1.55942 |
|  | H | -1.16795 | -1.50786 | 0.69745 |  | H | -1.87656 | 0.68578 | 0.56613 |
|  | H | -2.25558 | -0.30393 | 0.51597 |  | H | -2.24262 | 0.41925 | -0.98691 |
|  | H | 0.44500 | 0.62134 | 1.25572 |  | H | 2.27324 | 0.37569 | 0.29924 |
|  |  |  |  |  |  | K | -1.95503 | -0.79645 | -0.80990 |

| **Ligand** | **Atom** | **X** | **Y** | **Z** | **Complex** | **Atom** | **X** | **Y** | **Z** |
| --- | --- | --- | --- | --- | --- | --- | --- | --- | --- |
| **K+(EAM)** | C | 0.63774 | -0.75941 | -0.70992 | **K+(EAM)** | C | -1.96877 | 0.11135 | -1.21986 |
| **M2** | C | 2.04590 | -1.20426 | -0.36705 | **M3** | C | -0.61263 | -0.57300 | -1.08649 |
|  | N | -0.15169 | -0.41658 | 0.49723 |  | N | -2.59669 | 0.05038 | 0.10732 |
|  | O | 2.58820 | -0.13730 | 0.40822 |  | O | 0.01255 | -0.07272 | 0.11134 |
|  | H | 0.11507 | -1.53527 | -1.27663 |  | H | -2.55608 | -0.34813 | -2.02342 |
|  | H | 0.70717 | 0.13371 | -1.33894 |  | H | -1.81407 | 1.16372 | -1.47062 |
|  | H | 2.62143 | -1.37664 | -1.28503 |  | H | 0.03585 | -0.35149 | -1.93736 |
|  | H | 2.01943 | -2.14166 | 0.20649 |  | H | -0.73471 | -1.66076 | -1.01070 |
|  | H | 0.49888 | 0.09805 | 1.09946 |  | H | -3.09334 | -0.83035 | 0.23413 |
|  | H | -0.32886 | -1.28462 | 1.00858 |  | H | -3.28183 | 0.79288 | 0.22637 |
|  | H | 3.49021 | -0.37334 | 0.68350 |  | H | -0.79326 | 0.08482 | 0.67657 |
|  | K | -2.36152 | 1.17244 | 0.03253 |  | K | 2.41065 | 0.21833 | 0.92112 |

| **Ligand** | **Atom** | **X** | **Y** | **Z** | **Complex** | **Atom** | **X** | **Y** | **Z** |
| --- | --- | --- | --- | --- | --- | --- | --- | --- | --- |
| **GLY** | C | -0.18115 | -0.00203 | -1.01622 | **K+(GLY)** | C | -1.27163 | 0.29008 | -0.11163 |
|  | C | -0.22415 | 0.00956 | 0.49826 | **M1[N,CO]** | C | -0.49209 | 1.56747 | 0.10558 |
|  | N | 1.15094 | -0.04236 | -1.58894 |  | N | 0.93646 | 1.37166 | -0.18152 |
|  | O | -1.50177 | 0.04743 | 0.95637 |  | O | -0.78233 | -0.83132 | -0.20239 |
|  | O | 0.74726 | -0.01175 | 1.23248 |  | O | -2.58075 | 0.53258 | -0.16053 |
|  | H | -0.71333 | 0.88427 | -1.37678 |  | H | 1.08678 | 1.51773 | -1.18119 |
|  | H | 1.63855 | -0.86182 | -1.23081 |  | H | -0.61620 | 1.83621 | 1.16003 |
|  | H | 1.68281 | 0.75389 | -1.24164 |  | H | -0.96584 | 2.36518 | -0.47664 |
|  | H | -1.43559 | 0.05241 | 1.93358 |  | H | -3.05015 | -0.32379 | -0.26071 |
|  | H | -0.76108 | -0.86281 | -1.36479 |  | H | 1.45696 | 2.12438 | 0.27017 |
|  |  |  |  |  |  | K | 1.73790 | -1.36193 | 0.24730 |

| **Ligand** | **Atom** | **X** | **Y** | **Z** | **Complex** | **Atom** | **X** | **Y** | **Z** |
| --- | --- | --- | --- | --- | --- | --- | --- | --- | --- |
| **K+(GLY)** | C | -2.08101 | 0.62158 | 0.00068 | **K+(GLY)** | C | 1.98684 | 0.69378 | -0.00004 |
| **M3[CO,OH]** | C | -0.57601 | 0.39699 | 0.00043 | **ZW[COO­]** | C | 0.47826 | 0.35949 | -0.00024 |
|  | N | -2.74656 | -0.68403 | -0.00079 |  | O | -0.31149 | 1.32269 | -0.00318 |
|  | O | -0.22135 | -0.89947 | -0.00096 |  | O | 0.21480 | -0.89277 | 0.00205 |
|  | O | 0.26608 | 1.28549 | 0.00139 |  | N | 2.70175 | -0.62824 | 0.00350 |
|  | H | -2.32781 | 1.22560 | -0.87716 |  | H | 1.87233 | -1.29750 | 0.00295 |
|  | H | -2.32781 | 1.22358 | 0.87990 |  | H | 3.28046 | -0.78120 | 0.83442 |
|  | H | -3.33499 | -0.81223 | -0.82036 |  | H | 3.28415 | -0.78385 | -0.82434 |
|  | H | -3.33518 | -0.81399 | 0.81836 |  | H | 2.25754 | 1.26307 | -0.88884 |
|  | H | -1.11598 | -1.38070 | -0.00143 |  | H | 2.25653 | 1.26751 | 0.88619 |
|  | K | 2.48695 | -0.20282 | -0.00020 |  | K | -2.41476 | -0.26470 | -0.00127 |

| **Complex** | **Atom** | **X** | **Y** | **Z** | **Complex** | **Atom** | **X** | **Y** | **Z** |
| --- | --- | --- | --- | --- | --- | --- | --- | --- | --- |
| **K+(GLY)** | C | -1.15774 | -0.57347 | -0.21364 | **K+(GLY)** | C | -0.68571 | 0.32845 | 1.44091 |
| **M4[N, CO]** | C | -1.38804 | 0.90250 | 0.07624 | **M5[N,OH]** | C | 0.65000 | 0.89436 | 1.02032 |
|  | O | -0.04881 | -1.07305 | -0.31930 |  | O | 0.94861 | 0.65058 | -0.30991 |
|  | O | -2.24664 | -1.34145 | -0.31516 |  | O | 1.38453 | 1.54169 | 1.72735 |
|  | N | -0.14662 | 1.66808 | -0.08419 |  | N | -0.99240 | -0.96780 | 0.80709 |
|  | H | -0.25406 | 2.56111 | 0.39789 |  | H | -0.41838 | -1.68501 | 1.25582 |
|  | H | -0.04059 | 1.91086 | -1.07039 |  | H | -1.95041 | -1.21466 | 1.06299 |
|  | H | -2.21485 | 1.26863 | -0.54768 |  | H | -1.44902 | 1.05350 | 1.13776 |
|  | H | -1.72117 | 0.97834 | 1.11760 |  | H | -0.67660 | 0.30237 | 2.53467 |
|  | H | -3.06984 | -0.82106 | -0.23791 |  | H | 1.80220 | 1.11695 | -0.45346 |
|  | K | 2.20869 | -0.01224 | 0.35947 |  | K | -0.46378 | -0.93019 | -1.96285 |

| **Complex** | **Atom** | **X** | **Y** | **Z** | **Complex** | **Atom** | **X** | **Y** | **Z** |
| --- | --- | --- | --- | --- | --- | --- | --- | --- | --- |
| **K+(GLY)** | C | -1.69157 | -0.59463 | -0.92884 | **K+(GLY)** | C | 0.78498 | -0.39570 | -0.01925 |
| **M7[N]** | C | -0.32022 | -0.69542 | -0.28765 | **M8[CO]** | C | 1.63982 | 0.83591 | -0.25758 |
|  | O | -2.28129 | 0.45809 | -1.08854 |  | O | -0.44511 | -0.36218 | 0.08705 |
|  | O | -2.15732 | -1.80852 | -1.26458 |  | O | 1.48190 | -1.52532 | 0.06613 |
|  | N | 0.27424 | 0.63125 | -0.04782 |  | N | 3.06618 | 0.68173 | -0.36586 |
|  | H | 0.42306 | 1.05605 | -0.96684 |  | H | 3.46651 | 0.28631 | 0.48014 |
|  | H | -0.47787 | 1.21018 | 0.33870 |  | H | 3.32063 | 0.07384 | -1.13920 |
|  | H | 0.33513 | -1.29394 | -0.92571 |  | H | 1.40654 | 1.53124 | 0.55708 |
|  | H | -0.42835 | -1.23624 | 0.65799 |  | H | 1.25105 | 1.30520 | -1.16871 |
|  | H | -3.05119 | -1.68570 | -1.65023 |  | H | 0.85529 | -2.26451 | 0.21942 |
|  | K | 2.57154 | 0.84604 | 1.52657 |  | K | -2.87402 | 0.35551 | 0.21304 |

| **Complex** | **Atom** | **X** | **Y** | **Z** |
| --- | --- | --- | --- | --- |
| **K+(GLY)** | C | -0.76083 | -0.00002 | 0.00000 |
| **M9[CO,OH]** | C | 0.76083 | 0.00002 | 0.00002 |
|  | N | -1.22633 | -1.38956 | -0.00156 |
|  | O | 1.30299 | 1.22978 | 0.00130 |
|  | O | 1.46252 | -1.00313 | -0.00107 |
|  | H | -1.09393 | 0.56097 | -0.87782 |
|  | H | -1.09393 | 0.55895 | 0.87914 |
|  | H | -0.90619 | -1.90086 | 0.81726 |
|  | H | -0.90602 | -1.89908 | -0.82143 |
|  | H | 0.48920 | 1.83783 | 0.00191 |
|  | K | 3.87874 | 0.14101 | 0.00009 |

**Table S4.** Cartesian coordinates for MP2/6-31+G(d,p) optimized structures.

| **Ligand** | **Atom** | **X** | **Y** | **Z** | **Complex** | **Atom** | **X** | **Y** | **Z** |
| --- | --- | --- | --- | --- | --- | --- | --- | --- | --- |
| **PAM** | N | 2.00721 | -0.11760 | 0.00016 | **K+(PAM)** | C | 2.85307 | 0.62449 | -0.00346 |
|  | C | -0.50420 | 0.17060 | -0.00007 | **M1** | C | 1.38341 | 0.45428 | 0.36181 |
|  | C | 0.70648 | -0.75570 | -0.00030 |  | H | 3.04116 | 0.30032 | -1.02579 |
|  | O | -0.37310 | 1.39325 | -0.00008 |  | H | 3.48960 | 0.04102 | 0.65725 |
|  | C | -1.85860 | -0.49370 | 0.00014 |  | H | 3.15143 | 1.66772 | 0.08027 |
|  | H | 2.09242 | 0.48757 | -0.80850 |  | C | 0.46213 | 1.24609 | -0.55084 |
|  | H | 2.09236 | 0.48667 | 0.80946 |  | H | 1.22154 | 0.77184 | 1.39502 |
|  | H | 0.62583 | -1.41090 | -0.87140 |  | H | 1.12137 | -0.60824 | 0.31093 |
|  | H | 0.62561 | -1.41160 | 0.87027 |  | N | -0.95255 | 1.10425 | -0.12551 |
|  | H | -1.96210 | -1.13230 | -0.87710 |  | H | 0.54089 | 0.87665 | -1.57383 |
|  | H | -2.63870 | 0.26107 | -0.00070 |  | H | 0.77765 | 2.29164 | -0.56053 |
|  | H | -1.96250 | -1.13070 | 0.87852 |  | H | -1.53915 | 1.63537 | -0.76524 |
|  | N | 2.00721 | -0.11760 | 0.00016 |  | H | -1.05849 | 1.57608 | 0.77044 |
|  |  |  |  |  |  | K | -1.69841 | -1.59112 | 0.14447 |

| **Ligand** | **Atom** | **X** | **Y** | **Z** | **Complex** | **Atom** | **X** | **Y** | **Z** |
| --- | --- | --- | --- | --- | --- | --- | --- | --- | --- |
| **K+(PAM)** | C | -1.74087 | 0.55770 | -0.23694 | **K+(PAM)** | C | -1.77616 | -1.00977 | -2.64977 |
| **M2** | C | -0.90343 | 1.80663 | 0.01135 | **M3** | C | -1.79285 | -0.82969 | -1.13669 |
|  | H | -1.32175 | -0.05073 | -1.03927 |  | C | -0.48250 | -0.26112 | -0.61268 |
|  | H | -2.74947 | 0.82119 | -0.54610 |  | N | -0.43085 | -0.06019 | 0.85637 |
|  | H | -1.83149 | -0.03755 | 0.67521 |  | H | -1.61430 | -0.05837 | -3.15487 |
|  | C | 0.45668 | 1.53998 | 0.63555 |  | H | -2.72090 | -1.41654 | -3.00195 |
|  | H | -1.44711 | 2.47694 | 0.67697 |  | H | -0.98509 | -1.69432 | -2.95323 |
|  | H | -0.76970 | 2.35023 | -0.92636 |  | H | -1.98165 | -1.78857 | -0.64880 |
|  | N | 1.27549 | 0.63119 | -0.20745 |  | H | -2.60755 | -0.16123 | -0.84937 |
|  | H | 0.33043 | 1.06511 | 1.61089 |  | H | -0.28813 | 0.70357 | -1.08614 |
|  | H | 0.96331 | 2.49153 | 0.80509 |  | H | 0.33902 | -0.92703 | -0.88516 |
|  | H | 2.23547 | 0.66782 | 0.12888 |  | H | -0.63750 | -0.95155 | 1.30281 |
|  | H | 1.32219 | 1.02921 | -1.14375 |  | H | -1.21083 | 0.53911 | 1.11908 |
|  | K | 0.39292 | -2.03463 | -0.06575 |  | K | 2.05431 | 0.98841 | 1.60831 |

| **Ligand** | **Atom** | **X** | **Y** | **Z** | **Complex** | **Atom** | **X** | **Y** | **Z** |
| --- | --- | --- | --- | --- | --- | --- | --- | --- | --- |
| **POH** | C | 1.52215 | -0.52048 | 0.12958 | **K+(POH)** | C | 0.00617 | -0.17537 | -2.84927 |
|  | C | 0.63405 | 0.64285 | -0.29128 | **M1** | C | -0.02668 | -0.12646 | -1.32477 |
|  | C | -0.75960 | 0.55542 | 0.29224 |  | H | 1.02939 | -0.24926 | -3.21205 |
|  | O | -1.36748 | -0.64025 | -0.21310 |  | H | -0.44348 | 0.71947 | -3.27486 |
|  | H | 1.09834 | -1.46487 | -0.20200 |  | H | -0.54410 | -1.03606 | -3.22037 |
|  | H | 1.62141 | -0.55610 | 1.21485 |  | C | 0.73313 | 1.06378 | -0.78476 |
|  | H | 2.51998 | -0.42265 | -0.29507 |  | H | 0.41874 | -1.04228 | -0.92502 |
|  | H | 0.54812 | 0.67830 | -1.37831 |  | H | -1.06594 | -0.06579 | -0.98834 |
|  | H | 1.07542 | 1.58954 | 0.02811 |  | O | 0.65315 | 1.03631 | 0.66713 |
|  | H | -1.34675 | 1.43141 | 0.00340 |  | H | 0.29625 | 1.99316 | -1.14958 |
|  | H | -0.70519 | 0.52156 | 1.38522 |  | H | 1.77938 | 1.01769 | -1.08633 |
|  | H | -2.25111 | -0.72192 | 0.16535 |  | H | 1.14118 | 1.80022 | 1.00479 |
|  |  |  |  |  |  | K | -0.63749 | -0.84207 | 1.96145 |

| **Ligand** | **Atom** | **X** | **Y** | **Z** | **Complex** | **Atom** | **X** | **Y** | **Z** |
| --- | --- | --- | --- | --- | --- | --- | --- | --- | --- |
| **K+(POH)** | C | -1.53330 | 0.90185 | 0.97193 | **K+(POH)** | C | -3.30025 | -0.48385 | -0.02848 |
| **M2** | C | -1.47319 | 0.62556 | -0.52661 | **M3** | C | -2.04108 | 0.25557 | -0.46974 |
|  | C | -1.31849 | -0.83953 | -0.86638 |  | C | -0.91039 | 0.06351 | 0.51720 |
|  | O | -0.00558 | -1.27631 | -0.41273 |  | O | 0.31164 | 0.73514 | 0.09180 |
|  | H | -0.67153 | 0.49683 | 1.50338 |  | H | -3.64390 | -0.13042 | 0.94218 |
|  | H | -2.41297 | 0.43537 | 1.41085 |  | H | -3.12002 | -1.55537 | 0.04355 |
|  | H | -1.59033 | 1.96923 | 1.17412 |  | H | -4.10416 | -0.32915 | -0.74328 |
|  | H | -0.66711 | 1.18727 | -1.00944 |  | H | -2.25466 | 1.32334 | -0.55982 |
|  | H | -2.39129 | 0.97986 | -0.99581 |  | H | -1.71818 | -0.09412 | -1.45085 |
|  | H | -1.39120 | -1.00148 | -1.94106 |  | H | -0.64245 | -0.98880 | 0.60011 |
|  | H | -2.08286 | -1.43125 | -0.36259 |  | H | -1.18534 | 0.42667 | 1.50807 |
|  | H | 0.03309 | -2.23726 | -0.51521 |  | H | 0.07290 | 1.65552 | -0.08903 |
|  | K | 1.95625 | 0.29919 | 0.34547 |  | K | 2.71647 | -0.27369 | -0.05786 |

| **Ligand** | **Atom** | **X** | **Y** | **Z** | **Complex** | **Atom** | **X** | **Y** | **Z** |
| --- | --- | --- | --- | --- | --- | --- | --- | --- | --- |
| **PPA** | C | 1.95986 | 0.09033 | -0.00004 | **K+(PPA)** | C | -2.71377 | 0.38349 | -0.01808 |
|  | C | 0.68821 | -0.74080 | 0.00005 | **M1** | C | -0.53588 | -0.87734 | 0.20934 |
|  | H | 2.83145 | -0.56074 | 0.00003 |  | C | -2.03763 | -0.94790 | 0.26398 |
|  | H | 2.00469 | 0.72944 | 0.87812 |  | O | 0.10784 | 0.14038 | -0.03306 |
|  | H | 2.00469 | 0.72926 | -0.87832 |  | O | 0.14888 | -2.01246 | 0.44363 |
|  | C | -0.55605 | 0.10389 | -0.00002 |  | H | -3.79261 | 0.26523 | 0.03660 |
|  | H | 0.63534 | -1.39522 | 0.87124 |  | H | -2.31102 | -1.32431 | 1.25271 |
|  | H | 0.63532 | -1.39540 | -0.87100 |  | H | -2.35557 | -1.70844 | -0.45327 |
|  | O | -1.67883 | -0.66969 | -0.00003 |  | H | -0.44733 | -2.75635 | 0.62371 |
|  | O | -0.60000 | 1.32325 | 0.00003 |  | H | -2.45904 | 0.74552 | -1.01051 |
|  | H | -2.43298 | -0.05634 | -0.00002 |  | H | -2.41426 | 1.13269 | 0.70982 |
|  |  |  |  |  |  | K | 2.28683 | 1.43541 | -0.37763 |

| **Ligand** | **Atom** | **X** | **Y** | **Z** | **Complex** | **Atom** | **X** | **Y** | **Z** |
| --- | --- | --- | --- | --- | --- | --- | --- | --- | --- |
| **K+(PPA)** | C | 1.30672 | 1.88269 | 0.00390 | **K+(PPA)** | C | 2.82816 | -0.86306 | -0.40527 |
| **M2** | C | 1.09033 | -0.63378 | 0.00729 | **M3** | C | 0.80683 | 0.45340 | 0.27988 |
|  | C | 2.01983 | 0.54198 | 0.00996 |  | C | 1.73053 | -0.66548 | 0.64538 |
|  | O | -0.14451 | -0.57039 | 0.00078 |  | O | -0.40442 | 0.33858 | 0.04962 |
|  | O | 1.74448 | -1.79651 | 0.01277 |  | O | 1.43218 | 1.63006 | 0.20717 |
|  | H | 2.03586 | 2.68839 | 0.00628 |  | H | 3.45610 | -1.70245 | -0.11907 |
|  | H | 0.68075 | 1.99790 | 0.88659 |  | H | 3.45167 | 0.02267 | -0.48474 |
|  | H | 0.68998 | 1.99480 | -0.88565 |  | H | 2.40003 | -1.07852 | -1.38236 |
|  | H | 2.67412 | 0.43085 | -0.85582 |  | H | 1.13102 | -1.56392 | 0.76485 |
|  | H | 2.66518 | 0.43395 | 0.88282 |  | H | 2.18068 | -0.41982 | 1.60756 |
|  | H | 1.10138 | -2.52659 | 0.01080 |  | H | 0.79300 | 2.31885 | -0.04447 |
|  | K | -2.58675 | 0.16687 | -0.01475 |  | K | -2.83304 | -0.36185 | -0.29031 |

| **Ligand** | **Atom** | **X** | **Y** | **Z** | **Complex** | **Atom** | **X** | **Y** | **Z** |
| --- | --- | --- | --- | --- | --- | --- | --- | --- | --- |
| **MEK** | C | -2.00708 | -0.02210 | 0.00014 | **K+(MEK)** | C | -2.28802 | -0.23275 | -0.73519 |
|  | C | -0.67860 | -0.75853 | -0.00019 |  | C | 0.21398 | -0.58619 | -1.03876 |
|  | H | -2.83389 | -0.72989 | -0.00005 |  | C | -1.16144 | -0.71508 | -1.63146 |
|  | H | -2.09441 | 0.61477 | -0.87665 |  | O | 0.40197 | 0.00122 | 0.03843 |
|  | H | -2.09431 | 0.61416 | 0.87739 |  | C | 1.35337 | -1.20939 | -1.78752 |
|  | C | 0.52511 | 0.16148 | 0.00003 |  | H | -3.24478 | -0.36389 | -1.23387 |
|  | H | -0.59020 | -1.41482 | -0.87052 |  | H | -2.17448 | 0.82319 | -0.49985 |
|  | H | -0.59008 | -1.41544 | 0.86966 |  | H | -2.31437 | -0.79530 | 0.19594 |
|  | C | 1.88182 | -0.50224 | 0.00009 |  | H | -1.29664 | -1.76068 | -1.91907 |
|  | O | 0.40544 | 1.38578 | -0.00009 |  | H | -1.14460 | -0.16197 | -2.57541 |
|  | H | 2.66127 | 0.25337 | -0.00053 |  | H | 2.30340 | -0.82813 | -1.42714 |
|  | H | 1.98511 | -1.14057 | -0.87733 |  | H | 1.25524 | -1.03572 | -2.85704 |
|  | C | -2.00708 | -0.02210 | 0.00014 |  | H | 1.32036 | -2.28888 | -1.63220 |
|  |  |  |  |  |  | K | 0.70383 | 1.20327 | 2.25257 |

| **Ligand** | **Atom** | **X** | **Y** | **Z** | **Complex** | **Atom** | **X** | **Y** | **Z** |
| --- | --- | --- | --- | --- | --- | --- | --- | --- | --- |
| **AMP** | N | 2.00721 | -0.11756 | 0.00016 | **K+(AMP)** | N | -0.69864 | 1.46068 | 0.47298 |
|  | C | -0.50423 | 0.17060 | -0.00007 | **M1** | C | 1.27210 | -0.03483 | 0.30221 |
|  | C | 0.70648 | -0.75568 | -0.00026 |  | C | 0.76536 | 1.39253 | 0.39617 |
|  | O | -0.37314 | 1.39325 | -0.00008 |  | O | 0.49649 | -0.97114 | 0.08764 |
|  | C | -1.85863 | -0.49372 | 0.00014 |  | C | 2.74285 | -0.24251 | 0.48624 |
|  | H | 2.09242 | 0.48757 | -0.80846 |  | H | -0.98502 | 1.29078 | 1.43360 |
|  | H | 2.09236 | 0.48667 | 0.80946 |  | H | 1.09863 | 1.90419 | -0.50973 |
|  | H | 0.62583 | -1.41088 | -0.87136 |  | H | 1.27665 | 1.88409 | 1.22898 |
|  | H | 0.62561 | -1.41161 | 0.87027 |  | H | 3.03423 | -1.21047 | 0.09226 |
|  | H | -1.96211 | -1.13231 | -0.87715 |  | H | 2.96866 | -0.21201 | 1.55325 |
|  | H | -2.63873 | 0.26107 | -0.00066 |  | H | 3.31434 | 0.55213 | 0.00993 |
|  | H | -1.96248 | -1.13075 | 0.87852 |  | H | -0.98983 | 2.41237 | 0.27083 |
|  |  |  |  |  |  | K | -1.97268 | -0.82988 | -0.79994 |

| **Ligand** | **Atom** | **X** | **Y** | **Z** |
| --- | --- | --- | --- | --- |
| **K+(AMP)** | N | -0.54861 | 2.50160 | 0.03744 |
| **M2** | C | -1.57606 | 1.49888 | -0.04764 |
|  | C | -1.16530 | 0.03977 | -0.01244 |
|  | C | -2.26802 | -0.97342 | 0.05221 |
|  | O | 0.02695 | -0.30075 | -0.01772 |
|  | H | -2.30256 | 1.64923 | 0.75534 |
|  | H | -2.14423 | 1.63768 | -0.97228 |
|  | H | -1.92201 | -1.94032 | -0.29972 |
|  | H | -3.13391 | -0.65003 | -0.52121 |
|  | H | -2.58432 | -1.07057 | 1.09217 |
|  | H | 0.10761 | 2.45714 | -0.72950 |
|  | H | -0.04733 | 2.47779 | 0.91462 |
|  | K | 2.40567 | -1.21355 | -0.01645 |

| **Ligand** | **Atom** | **X** | **Y** | **Z** | **Complex** | **Atom** | **X** | **Y** | **Z** |
| --- | --- | --- | --- | --- | --- | --- | --- | --- | --- |
| **EAM** | C | 0.63338 | 0.65027 | -0.27861 | **K+(EAM)** | C | -0.74507 | -1.44949 | -0.63417 |
|  | C | -0.77840 | 0.56046 | 0.27352 | **M1** | C | 0.48827 | -1.72821 | 0.19029 |
|  | N | 1.35805 | -0.56000 | 0.12369 |  | N | -1.53385 | -0.34301 | -0.05600 |
|  | O | -1.41352 | -0.63122 | -0.16899 |  | O | 1.31806 | -0.54264 | 0.21317 |
|  | H | 1.10423 | 1.58253 | 0.05093 |  | H | -1.31375 | -2.37977 | -0.70841 |
|  | H | 0.58401 | 0.66094 | -1.36659 |  | H | -0.44556 | -1.16495 | -1.64216 |
|  | H | -1.38373 | 1.39483 | -0.07574 |  | H | 1.03803 | -2.55561 | -0.25608 |
|  | H | -0.74710 | 0.59721 | 1.36910 |  | H | 0.21767 | -1.99937 | 1.21284 |
|  | H | 1.66524 | -0.49938 | 1.08794 |  | H | -1.90296 | -0.63749 | 0.84535 |
|  | H | 2.17883 | -0.71350 | -0.44798 |  | H | -2.35444 | -0.19057 | -0.63647 |
|  | H | -0.72952 | -1.31728 | -0.10105 |  | H | 2.21592 | -0.81591 | 0.44424 |
|  |  |  |  |  |  | K | 0.22517 | 1.87116 | 0.11003 |

| **Ligand** | **Atom** | **X** | **Y** | **Z** | **Complex** | **Atom** | **X** | **Y** | **Z** |
| --- | --- | --- | --- | --- | --- | --- | --- | --- | --- |
| **K+(EAM)** | C | 0.61408 | -0.80786 | -0.69587 | **K+(EAM)** | C | -1.97837 | 0.10919 | -1.22232 |
| **M2** | C | 2.03081 | -1.22932 | -0.36465 | **M3** | C | -0.62591 | -0.57762 | -1.08795 |
|  | N | -0.17880 | -0.48336 | 0.51067 |  | N | -2.61744 | 0.04443 | 0.09773 |
|  | O | 2.56701 | -0.14852 | 0.40306 |  | O | 0.00410 | -0.08420 | 0.11397 |
|  | H | 0.10711 | -1.59122 | -1.25779 |  | H | -2.55632 | -0.34970 | -2.02618 |
|  | H | 0.66601 | 0.08132 | -1.32552 |  | H | -1.82558 | 1.15842 | -1.46872 |
|  | H | 2.60004 | -1.38780 | -1.28219 |  | H | 0.02326 | -0.35410 | -1.93139 |
|  | H | 2.02832 | -2.15540 | 0.21642 |  | H | -0.74818 | -1.65968 | -1.00938 |
|  | H | 0.45437 | 0.01419 | 1.13665 |  | H | -3.11541 | -0.82943 | 0.23039 |
|  | H | -0.39321 | -1.35123 | 0.99634 |  | H | -3.28826 | 0.79180 | 0.22722 |
|  | H | 3.47509 | -0.34883 | 0.66324 |  | H | -0.78615 | 0.07385 | 0.68486 |
|  | K | -2.32061 | 1.23862 | 0.02194 |  | K | 2.43219 | 0.22853 | 0.92416 |

| **Ligand** | **Atom** | **X** | **Y** | **Z** | **Complex** | **Atom** | **X** | **Y** | **Z** |
| --- | --- | --- | --- | --- | --- | --- | --- | --- | --- |
| **GLY** | C | 0.72261 | -0.72993 | -0.00010 | **K+(GLY)** | N | 0.54459 | 1.58016 | -0.17549 |
|  | C | -0.53851 | 0.11264 | -0.00019 | **M1[N,CO]** | C | -1.31681 | -0.01961 | -0.04852 |
|  | N | 1.96684 | 0.00759 | 0.00010 |  | C | -0.87584 | 1.41258 | 0.15272 |
|  | H | 0.68100 | -1.38359 | -0.87169 |  | O | -0.55874 | -0.97859 | -0.17036 |
|  | H | 0.68082 | -1.38375 | 0.87137 |  | O | -2.64642 | -0.12025 | -0.04728 |
|  | O | -1.64927 | -0.67249 | 0.00010 |  | H | 0.63584 | 1.75773 | -1.17213 |
|  | O | -0.58295 | 1.33134 | -0.00001 |  | H | -1.03228 | 1.64102 | 1.20752 |
|  | H | 2.01940 | 0.61041 | 0.81223 |  | H | -1.54819 | 2.05930 | -0.41218 |
|  | H | 2.01949 | 0.61068 | -0.81183 |  | H | -2.89339 | -1.05850 | -0.13414 |
|  | H | -2.41546 | -0.07389 | 0.00023 |  | H | 0.88278 | 2.42300 | 0.27831 |
|  |  |  |  |  |  | K | 2.04949 | -0.91847 | 0.13563 |

| **Ligand** | **Atom** | **X** | **Y** | **Z** | **Complex** | **Atom** | **X** | **Y** | **Z** |
| --- | --- | --- | --- | --- | --- | --- | --- | --- | --- |
| **K+(GLY)** | C | -2.09159 | 0.62357 | 0.00058 | **K+(GLY)** | N | 2.70242 | -0.62349 | 0.00368 |
| **M3[CO,OH]** | C | -0.58864 | 0.40007 | 0.00034 | **ZW[COO­]** | C | 1.99961 | 0.70285 | 0.00015 |
|  | N | -2.76041 | -0.67826 | -0.00069 |  | C | 0.49340 | 0.37202 | -0.00024 |
|  | O | -0.22913 | -0.89846 | -0.00126 |  | O | -0.30683 | 1.32818 | -0.00303 |
|  | O | 0.25796 | 1.28525 | 0.00150 |  | O | 0.23008 | -0.88535 | 0.00229 |
|  | H | -2.33371 | 1.22452 | -0.87478 |  | H | 1.86252 | -1.27606 | 0.00433 |
|  | H | -2.33368 | 1.22275 | 0.87716 |  | H | 3.27587 | -0.77974 | 0.83046 |
|  | H | -3.34306 | -0.81199 | -0.81799 |  | H | 3.27742 | -0.78333 | -0.82133 |
|  | H | -3.34328 | -0.81346 | 0.81622 |  | H | 2.26949 | 1.26732 | -0.88638 |
|  | H | -1.10882 | -1.38280 | -0.00204 |  | H | 2.26818 | 1.27137 | 0.88449 |
|  | K | 2.50716 | -0.20670 | -0.00006 |  | K | -2.43234 | -0.28037 | -0.00163 |

| **Complex** | **Atom** | **X** | **Y** | **Z** | **Complex** | **Atom** | **X** | **Y** | **Z** |
| --- | --- | --- | --- | --- | --- | --- | --- | --- | --- |
| **K+(GLY)** | N | -0.05048 | 1.68678 | -0.11409 | **K+(GLY)** | N | -1.41857 | 0.32051 | -0.68075 |
| **M4[N, CO]** | C | -1.22370 | -0.47461 | -0.10363 | **M5[N,OH]** | C | -1.40788 | 0.29530 | 0.79126 |
|  | C | -1.32966 | 1.02232 | 0.14469 |  | H | -1.78540 | -0.56564 | -1.02046 |
|  | O | -0.15840 | -1.05727 | -0.24268 |  | H | -2.10156 | 1.01423 | -0.97392 |
|  | O | -2.36809 | -1.16709 | -0.12706 |  | C | -0.31343 | -0.57272 | 1.36566 |
|  | H | -0.05146 | 2.58972 | 0.34995 |  | O | 0.84469 | -0.57453 | 0.60250 |
|  | H | 0.02710 | 1.88929 | -1.10690 |  | H | -1.22952 | 1.30812 | 1.15579 |
|  | H | -2.15999 | 1.42300 | -0.44350 |  | H | -2.33775 | -0.05380 | 1.23855 |
|  | H | -1.59047 | 1.15319 | 1.19616 |  | O | -0.38719 | -1.17937 | 2.40914 |
|  | H | -3.14682 | -0.59545 | -0.03988 |  | H | 1.46891 | -1.12752 | 1.10927 |
|  | K | 2.25301 | -0.19782 | 0.18707 |  | K | 1.18859 | 0.67772 | -1.77782 |

| **Complex** | **Atom** | **X** | **Y** | **Z** | **Complex** | **Atom** | **X** | **Y** | **Z** |
| --- | --- | --- | --- | --- | --- | --- | --- | --- | --- |
| **K+(GLY)** | C | -1.98482 | -0.81554 | -0.13623 | **K+(GLY)** | K | 2.61534 | 0.83191 | 1.51322 |
| **M6[CO]** | C | -0.72161 | 0.02336 | 0.00403 | **M7[N]** | N | 0.24910 | 0.64276 | -0.02533 |
|  | N | -3.15256 | 0.05024 | 0.00858 |  | C | -1.71072 | -0.58828 | -0.93097 |
|  | O | -0.93168 | 1.30999 | 0.22005 |  | C | -0.35086 | -0.67746 | -0.26254 |
|  | O | 0.41334 | -0.45132 | -0.07586 |  | O | -2.29866 | 0.46044 | -1.13006 |
|  | H | -1.94339 | -1.59689 | 0.62142 |  | O | -2.17148 | -1.81199 | -1.24717 |
|  | H | -1.94335 | -1.30814 | -1.10673 |  | H | 0.39747 | 1.07628 | -0.93454 |
|  | H | -3.73529 | -0.20933 | 0.79420 |  | H | -0.47691 | 1.22516 | 0.39009 |
|  | H | -3.73450 | 0.06157 | -0.81930 |  | H | 0.30727 | -1.28345 | -0.88300 |
|  | H | -1.92737 | 1.39209 | 0.23419 |  | H | -0.47983 | -1.20564 | 0.68232 |
|  | K | 2.93353 | -0.04249 | -0.00759 |  | H | -3.05245 | -1.71115 | -1.64975 |

| **Complex** | **Atom** | **X** | **Y** | **Z** |  | **Atom** | **X** | **Y** | **Z** |
| --- | --- | --- | --- | --- | --- | --- | --- | --- | --- |
| **K+(GLY)** | N | 3.09503 | 0.68105 | -0.36835 | **K+(GLY)** | C | 2.16024 | 0.46959 | 0.00002 |
| **M8[CO]** | C | 0.79963 | -0.37040 | -0.02370 | **M9[CO,OH]** | C | 0.65889 | 0.24010 | 0.00000 |
|  | C | 1.67275 | 0.84905 | -0.26216 |  | N | 2.98416 | -0.70288 | 0.00002 |
|  | O | -0.43226 | -0.30987 | 0.07927 |  | O | -0.14247 | 1.35634 | 0.00001 |
|  | O | 1.47316 | -1.51384 | 0.06553 |  | O | 0.09499 | -0.84194 | -0.00002 |
|  | H | 3.50910 | 0.30863 | 0.47518 |  | H | 2.39438 | 1.08168 | 0.87483 |
|  | H | 3.36281 | 0.09612 | -1.14798 |  | H | 2.39440 | 1.08169 | -0.87479 |
|  | H | 1.44403 | 1.54102 | 0.55018 |  | H | 2.84891 | -1.27464 | -0.82261 |
|  | H | 1.28889 | 1.31551 | -1.17105 |  | H | 2.84891 | -1.27464 | 0.82264 |
|  | H | 0.84560 | -2.24246 | 0.21751 |  | H | 0.37368 | 2.17887 | 0.00003 |
|  | K | -2.90932 | 0.31219 | 0.22165 |  | K | -2.54128 | -0.27611 | -0.00001 |

**Table S5.** Cartesian coordinates for B3LYP/aug-cc-pVDZ optimized structures.

| **Ligand** | **Atom** | **X** | **Y** | **Z** | **Complex** | **Atom** | **X** | **Y** | **Z** |
| --- | --- | --- | --- | --- | --- | --- | --- | --- | --- |
| **PAM** | C | -0.65822 | 0.37348 | -1.77971 | **K+(PAM)** | C | 2.87158 | 0.61840 | -0.00880 |
|  | C | -0.61612 | 0.35107 | -0.24840 | **M1** | C | 1.39403 | 0.44263 | 0.35404 |
|  | C | 0.62728 | -0.35737 | 0.30758 |  | C | 0.46007 | 1.23996 | -0.55542 |
|  | N | 0.73910 | -0.41959 | 1.76910 |  | N | -0.96144 | 1.09547 | -0.13247 |
|  | H | 0.21682 | 0.89616 | -2.19411 |  | H | 1.23271 | 0.75092 | 1.39995 |
|  | H | -1.55775 | 0.88604 | -2.14781 |  | H | 1.13635 | -0.63211 | 0.30044 |
|  | H | -0.66282 | -0.64643 | -2.19250 |  | H | 0.53930 | 0.87602 | -1.59005 |
|  | H | -1.51755 | -0.15054 | 0.14068 |  | H | 0.77226 | 2.29602 | -0.56349 |
|  | H | -0.64312 | 1.38291 | 0.13907 |  | H | -1.54986 | 1.61941 | -0.78133 |
|  | H | 1.53343 | 0.13950 | -0.07339 |  | H | -1.08067 | 1.58102 | 0.75869 |
|  | H | 0.66076 | -1.39087 | -0.07176 |  | H | 3.07090 | 0.29948 | -1.04152 |
|  | H | -0.06439 | -0.89977 | 2.17037 |  | H | 3.51220 | 0.02621 | 0.65636 |
|  | H | 0.74325 | 0.51709 | 2.16889 |  | H | 3.17523 | 1.66993 | 0.08406 |
|  |  |  |  |  |  | K | -1.70697 | -1.57690 | 0.15607 |

| **Ligand** | **Atom** | **X** | **Y** | **Z** | **Complex** | **Atom** | **X** | **Y** | **Z** |
| --- | --- | --- | --- | --- | --- | --- | --- | --- | --- |
| **K+(PAM)** | C | -1.75859 | 0.53927 | -0.20628 | **K+(PAM)** | C | -1.78525 | -1.01694 | -2.67984 |
| **M2** | C | -0.90177 | 1.78985 | 0.02273 | **M3** | C | -1.78192 | -0.82829 | -1.15973 |
|  | C | 0.46967 | 1.53918 | 0.65060 |  | C | -0.46177 | -0.25629 | -0.63886 |
|  | N | 1.31210 | 0.62326 | -0.17209 |  | N | -0.40646 | -0.05306 | 0.83730 |
|  | H | -1.37007 | -0.07811 | -1.03236 |  | H | -1.62967 | -0.06212 | -3.20263 |
|  | H | -2.78187 | 0.81266 | -0.49144 |  | H | -2.74487 | -1.42769 | -3.01765 |
|  | H | -1.83774 | -0.06787 | 0.71177 |  | H | -0.99512 | -1.71180 | -2.99929 |
|  | H | -1.44308 | 2.47854 | 0.68625 |  | H | -1.97360 | -1.79370 | -0.66428 |
|  | H | -0.77632 | 2.32669 | -0.93074 |  | H | -2.60374 | -0.15547 | -0.86620 |
|  | H | 0.34901 | 1.07658 | 1.64270 |  | H | -0.26311 | 0.71608 | -1.11596 |
|  | H | 0.96882 | 2.50704 | 0.80889 |  | H | 0.36837 | -0.92560 | -0.91361 |
|  | H | 2.26330 | 0.64789 | 0.19751 |  | H | -0.62050 | -0.94616 | 1.28645 |
|  | H | 1.40049 | 1.02320 | -1.10839 |  | H | -1.19335 | 0.54314 | 1.10287 |
|  | K | 0.37826 | -2.01575 | -0.10957 |  | K | 2.03550 | 0.98652 | 1.65262 |

| **Ligand** | **Atom** | **X** | **Y** | **Z** | **Complex** | **Atom** | **X** | **Y** | **Z** |
| --- | --- | --- | --- | --- | --- | --- | --- | --- | --- |
| **POH** | C | -0.36285 | -0.62725 | -1.76414 | **K+(POH)** | C | 0.00172 | -0.18290 | -2.86108 |
|  | C | -0.37185 | -0.59745 | -0.23315 | **M1** | C | -0.02881 | -0.13000 | -1.32916 |
|  | C | 0.37366 | 0.60316 | 0.33133 |  | C | 0.73315 | 1.06427 | -0.77771 |
|  | O | 0.30682 | 0.53814 | 1.76046 |  | O | 0.65254 | 1.03597 | 0.67609 |
|  | H | 0.66277 | -0.67776 | -2.15977 |  | H | 1.03203 | -0.25965 | -3.23367 |
|  | H | -0.84125 | 0.26901 | -2.18704 |  | H | -0.45277 | 0.71692 | -3.29699 |
|  | H | -0.90749 | -1.50332 | -2.14140 |  | H | -0.55449 | -1.05259 | -3.23143 |
|  | H | 0.08786 | -1.51320 | 0.16804 |  | H | 0.41601 | -1.05765 | -0.92767 |
|  | H | -1.40641 | -0.57260 | 0.14095 |  | H | -1.07879 | -0.07450 | -0.99142 |
|  | H | -0.08531 | 1.53980 | -0.03373 |  | H | 0.29650 | 2.00458 | -1.14378 |
|  | H | 1.42580 | 0.58860 | -0.00633 |  | H | 1.78941 | 1.02268 | -1.08011 |
|  | H | 0.77571 | 1.29357 | 2.13138 |  | H | 1.13772 | 1.79599 | 1.02092 |
|  |  |  |  |  |  | K | -0.63381 | -0.83641 | 1.96227 |

| **Ligand** | **Atom** | **X** | **Y** | **Z** | **Complex** | **Atom** | **X** | **Y** | **Z** |
| --- | --- | --- | --- | --- | --- | --- | --- | --- | --- |
| **K+(POH)** | C | -1.53507 | 0.93280 | 0.97320 | **K+(POH)** | C | -3.31769 | -0.49200 | -0.02175 |
| **M2** | C | -1.46643 | 0.63016 | -0.52838 | **M3** | C | -2.04338 | 0.23952 | -0.45936 |
|  | C | -1.30955 | -0.84229 | -0.87209 |  | C | -0.90812 | 0.05110 | 0.53570 |
|  | O | 0.01360 | -1.28833 | -0.45109 |  | O | 0.31898 | 0.72200 | 0.11559 |
|  | H | -0.66862 | 0.54086 | 1.53056 |  | H | -3.67672 | -0.12796 | 0.95105 |
|  | H | -2.42208 | 0.46878 | 1.42464 |  | H | -3.15002 | -1.57523 | 0.06103 |
|  | H | -1.59658 | 2.01309 | 1.15637 |  | H | -4.11995 | -0.33467 | -0.75284 |
|  | H | -0.65713 | 1.20139 | -1.01782 |  | H | -2.25501 | 1.31667 | -0.56159 |
|  | H | -2.39012 | 0.98249 | -1.00896 |  | H | -1.71914 | -0.11888 | -1.44773 |
|  | H | -1.40718 | -0.99921 | -1.95525 |  | H | -0.63877 | -1.01024 | 0.62805 |
|  | H | -2.07050 | -1.44435 | -0.35450 |  | H | -1.18763 | 0.41925 | 1.53391 |
|  | H | 0.06528 | -2.24208 | -0.59088 |  | H | 0.09262 | 1.64539 | -0.05928 |
|  | K | 1.94234 | 0.28746 | 0.36780 |  | K | 2.72200 | -0.25169 | -0.08447 |

| **Ligand** | **Atom** | **X** | **Y** | **Z** | **Complex** | **Atom** | **X** | **Y** | **Z** |
| --- | --- | --- | --- | --- | --- | --- | --- | --- | --- |
| **PPA** | C | 1.02190 | 0.03537 | -1.69443 | **K+(PPA)** | C | -2.70947 | 0.39076 | -0.01820 |
|  | C | 0.99280 | 0.06901 | -0.16848 | **M1** | C | -0.51625 | -0.89318 | 0.21297 |
|  | C | -0.40031 | -0.01983 | 0.40916 |  | C | -2.02454 | -0.94519 | 0.26251 |
|  | O | -0.38055 | 0.01357 | 1.77036 |  | O | 0.14065 | 0.10954 | -0.02809 |
|  | O | -1.43236 | -0.11041 | -0.21814 |  | O | 0.15245 | -2.03423 | 0.45162 |
|  | H | 2.05746 | 0.10307 | -2.05286 |  | H | -3.79747 | 0.26660 | 0.03684 |
|  | H | 0.45213 | 0.87160 | -2.11866 |  | H | -2.30639 | -1.33008 | 1.25625 |
|  | H | 0.58188 | -0.89399 | -2.07727 |  | H | -2.34940 | -1.71253 | -0.45913 |
|  | H | 1.45030 | 0.99010 | 0.22339 |  | H | -0.44828 | -2.77380 | 0.63236 |
|  | H | 1.57863 | -0.75607 | 0.26433 |  | H | -2.45802 | 0.76242 | -1.01908 |
|  | H | -1.30343 | -0.04733 | 2.06588 |  | H | -2.41437 | 1.14956 | 0.71682 |
|  |  |  |  |  |  | K | 2.25951 | 1.45900 | -0.38400 |

| **Ligand** | **Atom** | **X** | **Y** | **Z** | **Complex** | **Atom** | **X** | **Y** | **Z** |
| --- | --- | --- | --- | --- | --- | --- | --- | --- | --- |
| **K+(PPA)** | C | 1.34588 | 1.94575 | 0.00374 | **K+(PPA)** | C | 2.93889 | -0.86785 | -0.42289 |
| **M2** | C | 1.08567 | -0.59247 | 0.00733 | **M3** | C | 0.80442 | 0.40057 | 0.16843 |
|  | C | 2.02727 | 0.58053 | 0.00981 |  | C | 1.72889 | -0.73338 | 0.51673 |
|  | O | -0.14278 | -0.52734 | 0.00096 |  | O | -0.41889 | 0.30751 | 0.05521 |
|  | O | 1.72889 | -1.76123 | 0.01291 |  | O | 1.43425 | 1.56386 | 0.00069 |
|  | H | 2.10427 | 2.73756 | 0.00581 |  | H | 3.54881 | -1.72282 | -0.10780 |
|  | H | 0.71741 | 2.08499 | 0.89356 |  | H | 3.56491 | 0.03097 | -0.39658 |
|  | H | 0.72600 | 2.08143 | -0.89265 |  | H | 2.62037 | -1.04146 | -1.45921 |
|  | H | 2.69071 | 0.45629 | -0.85943 |  | H | 1.12976 | -1.65069 | 0.53505 |
|  | H | 2.68124 | 0.45953 | 0.88677 |  | H | 2.07949 | -0.54508 | 1.54427 |
|  | H | 1.08608 | -2.49010 | 0.01153 |  | H | 0.78667 | 2.25900 | -0.20400 |
|  | K | -2.60250 | 0.07242 | -0.01484 |  | K | -2.87821 | -0.26826 | -0.10171 |

| **Ligand** | **Atom** | **X** | **Y** | **Z** | **Complex** | **Atom** | **X** | **Y** | **Z** |
| --- | --- | --- | --- | --- | --- | --- | --- | --- | --- |
| **MEK** | C | 1.11741 | 0.00075 | -1.68885 | **K+(MEK)** | C | -2.32988 | -0.22392 | -0.73876 |
|  | C | 1.00246 | 0.00094 | -0.16694 |  | C | 0.19972 | -0.57654 | -1.02396 |
|  | C | -0.42812 | -0.00051 | 0.35388 |  | C | -1.18117 | -0.71059 | -1.61680 |
|  | C | -0.60314 | 0.00051 | 1.86130 |  | C | 1.34390 | -1.19422 | -1.78114 |
|  | O | -1.38630 | -0.00225 | -0.39745 |  | O | 0.39019 | 0.00591 | 0.04649 |
|  | H | 2.17257 | 0.00174 | -1.99344 |  | H | -3.28536 | -0.36517 | -1.25800 |
|  | H | 0.62985 | 0.88427 | -2.11977 |  | H | -2.23032 | 0.84427 | -0.50559 |
|  | H | 0.63159 | -0.88389 | -2.11941 |  | H | -2.37516 | -0.78319 | 0.20531 |
|  | H | 1.51261 | 0.87606 | 0.26969 |  | H | -1.31316 | -1.76568 | -1.90700 |
|  | H | 1.51438 | -0.87299 | 0.27000 |  | H | -1.15819 | -0.16520 | -2.57623 |
|  | H | -1.66840 | -0.00164 | 2.11356 |  | H | 2.30495 | -0.81813 | -1.41625 |
|  | H | -0.11901 | 0.88583 | 2.30035 |  | H | 1.24645 | -1.02010 | -2.86095 |
|  | H | -0.11489 | -0.88161 | 2.30220 |  | H | 1.30975 | -2.28566 | -1.63342 |
|  |  |  |  |  |  | K | 0.74653 | 1.18648 | 2.23917 |

| **Ligand** | **Atom** | **X** | **Y** | **Z** | **Complex** | **Atom** | **X** | **Y** | **Z** |
| --- | --- | --- | --- | --- | --- | --- | --- | --- | --- |
| **AMP** | C | 0.50291 | -0.11955 | 0.13905 | **K+(AMP)** | C | 2.74415 | -0.23989 | 0.46959 |
|  | C | -0.84536 | -0.12055 | -0.58954 | **M1** | C | 1.26897 | -0.03082 | 0.28001 |
|  | C | 1.55064 | -1.08966 | -0.36965 |  | C | 0.75600 | 1.40002 | 0.39848 |
|  | N | -1.85001 | 0.80894 | -0.10283 |  | O | 0.50506 | -0.95876 | 0.04111 |
|  | O | 0.71334 | 0.62577 | 1.07780 |  | N | -0.71178 | 1.48321 | 0.46601 |
|  | H | -2.03445 | 0.63138 | 0.88293 |  | H | -1.00955 | 1.35529 | 1.43332 |
|  | H | -1.48478 | 1.75908 | -0.13606 |  | H | 1.10762 | 1.92742 | -0.50290 |
|  | H | -1.24761 | -1.14677 | -0.55281 |  | H | 1.26942 | 1.88525 | 1.24558 |
|  | H | -0.65167 | 0.07572 | -1.65735 |  | H | 3.04844 | -1.20907 | 0.06274 |
|  | H | 1.17283 | -2.12194 | -0.31476 |  | H | 2.96288 | -0.22605 | 1.54982 |
|  | H | 2.46561 | -0.99928 | 0.22465 |  | H | 3.32800 | 0.57360 | 0.01715 |
|  | H | 1.77431 | -0.88831 | -1.42832 |  | H | -1.00229 | 2.42930 | 0.22561 |
|  |  |  |  |  |  | K | -1.96722 | -0.85389 | -0.76373 |

| **Ligand** | **Atom** | **X** | **Y** | **Z** |
| --- | --- | --- | --- | --- |
| **K+(AMP)** | C | 0.64365 | -2.06756 | -0.04647 |
| **M2** | C | 0.99510 | -0.58608 | -0.01814 |
|  | C | 2.45663 | -0.23321 | 0.02552 |
|  | N | -0.74183 | -2.45475 | 0.05381 |
|  | O | 0.12380 | 0.28500 | -0.01781 |
|  | H | -1.31045 | -2.08824 | -0.70290 |
|  | H | -1.16324 | -2.19027 | 0.93887 |
|  | H | 1.22602 | -2.55724 | 0.75176 |
|  | H | 1.07174 | -2.46667 | -0.98286 |
|  | H | 2.62445 | 0.79676 | -0.30623 |
|  | H | 3.05759 | -0.93227 | -0.57081 |
|  | H | 2.80189 | -0.32665 | 1.06815 |
|  | K | -1.50936 | 2.20994 | -0.01030 |

| **Ligand** | **Atom** | **X** | **Y** | **Z** | **Complex** | **Atom** | **X** | **Y** | **Z** |
| --- | --- | --- | --- | --- | --- | --- | --- | --- | --- |
| **EAM** | C | -0.61986 | 0.06674 | -0.71719 | **K+(EAM)** | C | -0.75096 | -1.44390 | -0.63061 |
|  | C | 0.88210 | 0.12919 | -0.45051 | **M1** | C | 0.49713 | -1.72338 | 0.18672 |
|  | N | -1.25889 | -0.72510 | 0.34677 |  | N | -1.55004 | -0.33399 | -0.05714 |
|  | O | 1.15684 | 0.65843 | 0.83939 |  | O | 1.33964 | -0.54445 | 0.20619 |
|  | H | -0.79666 | -0.32474 | -1.73563 |  | H | -1.32002 | -2.38519 | -0.69923 |
|  | H | -1.03177 | 1.08434 | -0.66976 |  | H | -0.46053 | -1.16257 | -1.65253 |
|  | H | 1.37364 | 0.78406 | -1.18297 |  | H | 1.04076 | -2.56205 | -0.26947 |
|  | H | 1.32052 | -0.88233 | -0.55536 |  | H | 0.23490 | -2.00030 | 1.22078 |
|  | H | -1.11809 | -1.72200 | 0.19726 |  | H | -1.92843 | -0.62552 | 0.84555 |
|  | H | -2.26164 | -0.56730 | 0.38008 |  | H | -2.37115 | -0.18396 | -0.64298 |
|  | H | 0.49806 | 0.26061 | 1.43012 |  | H | 2.22754 | -0.81098 | 0.47385 |
|  |  |  |  |  |  | K | 0.22279 | 1.86462 | 0.11252 |

| **Ligand** | **Atom** | **X** | **Y** | **Z** | **Complex** | **Atom** | **X** | **Y** | **Z** |
| --- | --- | --- | --- | --- | --- | --- | --- | --- | --- |
| **K+(EAM)** | C | 0.65067 | -0.74577 | -0.70219 | **K+(EAM)** | C | -1.98358 | 0.10965 | -1.24131 |
| **M2** | C | 2.06333 | -1.20313 | -0.36194 | **M3** | C | -0.60861 | -0.55777 | -1.11778 |
|  | N | -0.15968 | -0.40737 | 0.49770 |  | N | -2.60914 | 0.07032 | 0.09212 |
|  | O | 2.64319 | -0.14909 | 0.40952 |  | O | 0.01587 | -0.07792 | 0.09317 |
|  | H | 0.13328 | -1.52457 | -1.27815 |  | H | -2.57165 | -0.38128 | -2.03133 |
|  | H | 0.71983 | 0.15282 | -1.33342 |  | H | -1.85302 | 1.16306 | -1.52105 |
|  | H | 2.62906 | -1.38065 | -1.29043 |  | H | 0.03444 | -0.30429 | -1.96981 |
|  | H | 2.03511 | -2.14328 | 0.21593 |  | H | -0.70885 | -1.65346 | -1.06267 |
|  | H | 0.46070 | 0.11634 | 1.12121 |  | H | -3.10643 | -0.80291 | 0.25242 |
|  | H | -0.35176 | -1.27090 | 1.00878 |  | H | -3.27807 | 0.82359 | 0.21945 |
|  | H | 3.54746 | -0.37791 | 0.65456 |  | H | -0.77862 | 0.09465 | 0.65647 |
|  | K | -2.39397 | 1.16662 | 0.02770 |  | K | 2.41854 | 0.20423 | 0.95899 |

| **Ligand** | **Atom** | **X** | **Y** | **Z** | **Complex** | **Atom** | **X** | **Y** | **Z** |
| --- | --- | --- | --- | --- | --- | --- | --- | --- | --- |
| **GLY** | C | -0.16912 | -0.00234 | -1.01600 | **K+(GLY)** | C | -1.31114 | -0.02080 | -0.04208 |
|  | C | -0.22303 | 0.00964 | 0.50675 | **M1[N,CO]** | C | -0.86745 | 1.41907 | 0.14570 |
|  | N | 1.15693 | -0.04262 | -1.60211 |  | N | 0.55903 | 1.59816 | -0.16627 |
|  | O | -1.50466 | 0.04765 | 0.95684 |  | O | -0.56068 | -0.97641 | -0.16904 |
|  | O | 0.73238 | -0.01144 | 1.24952 |  | O | -2.63898 | -0.12816 | -0.02714 |
|  | H | -0.70917 | 0.88707 | -1.37338 |  | H | 0.66378 | 1.79438 | -1.16163 |
|  | H | -0.75708 | -0.86577 | -1.36130 |  | H | -1.04480 | 1.66101 | 1.20408 |
|  | H | 1.66140 | -0.86606 | -1.28104 |  | H | -1.54317 | 2.06507 | -0.43433 |
|  | H | 1.70574 | 0.75638 | -1.29223 |  | H | -2.88971 | -1.06479 | -0.11056 |
|  | H | -1.46826 | 0.05327 | 1.92734 |  | H | 0.89740 | 2.43555 | 0.30396 |
|  |  |  |  |  |  | K | 2.03538 | -0.92796 | 0.12158 |

| **Ligand** | **Atom** | **X** | **Y** | **Z** | **Complex** | **Atom** | **X** | **Y** | **Z** |
| --- | --- | --- | --- | --- | --- | --- | --- | --- | --- |
| **K+(GLY)** | C | -2.10187 | 0.59596 | 0.00062 | **K+(GLY)** | C | 2.00340 | 0.70707 | 0.00018 |
| **M3[CO,OH]** | C | -0.59822 | 0.34229 | 0.00030 | **ZW[COO­]** | C | 0.49285 | 0.36629 | -0.00024 |
|  | N | -2.80650 | -0.69218 | -0.00074 |  | N | 2.70969 | -0.62608 | 0.00376 |
|  | O | -0.26958 | -0.95613 | -0.00100 |  | O | -0.31931 | 1.30244 | -0.00287 |
|  | O | 0.26159 | 1.20724 | 0.00117 |  | O | 0.24428 | -0.88803 | 0.00223 |
|  | H | -2.33526 | 1.20994 | -0.87955 |  | H | 1.84567 | -1.26938 | 0.00433 |
|  | H | -2.33519 | 1.20790 | 0.88224 |  | H | 3.28337 | -0.78604 | 0.83310 |
|  | H | -3.39169 | -0.81781 | -0.82107 |  | H | 3.28494 | -0.78965 | -0.82379 |
|  | H | -3.39208 | -0.81929 | 0.81909 |  | H | 2.27716 | 1.27708 | -0.89249 |
|  | H | -1.15919 | -1.42468 | -0.00170 |  | H | 2.27576 | 1.28113 | 0.89068 |
|  | K | 2.55386 | -0.11311 | -0.00004 |  | K | -2.43747 | -0.26769 | -0.00172 |

| **Complex** | **Atom** | **X** | **Y** | **Z** | **Complex** | **Atom** | **X** | **Y** | **Z** |
| --- | --- | --- | --- | --- | --- | --- | --- | --- | --- |
| **K+(GLY)** | C | -1.21817 | -0.47362 | -0.09331 | **K+(GLY)** | C | 0.65727 | 0.93727 | 1.00102 |
| **M4[N, CO]** | C | -1.32528 | 1.03196 | 0.13544 | **M5[N,OH]** | C | -0.66142 | 0.35072 | 1.46940 |
|  | N | -0.04372 | 1.70822 | -0.10565 |  | N | -1.01825 | -0.93567 | 0.83626 |
|  | O | -0.16099 | -1.05744 | -0.23330 |  | O | 0.98869 | 0.61062 | -0.30337 |
|  | O | -2.35993 | -1.16715 | -0.10948 |  | O | 1.35250 | 1.65909 | 1.65897 |
|  | H | -0.04219 | 2.60421 | 0.37813 |  | H | -0.46993 | -1.67978 | 1.26997 |
|  | H | 0.03821 | 1.93771 | -1.09586 |  | H | -1.98324 | -1.15219 | 1.08507 |
|  | H | -2.15487 | 1.42830 | -0.47434 |  | H | -1.43281 | 1.09373 | 1.21608 |
|  | H | -1.61364 | 1.17273 | 1.18827 |  | H | -0.60401 | 0.31038 | 2.56539 |
|  | H | -3.14271 | -0.60250 | -0.01345 |  | H | 1.82161 | 1.08440 | -0.47779 |
|  | K | 2.24470 | -0.21323 | 0.17086 |  | K | -0.46887 | -0.99960 | -1.95683 |

| **Complex** | **Atom** | **X** | **Y** | **Z** | **Complex** | **Atom** | **X** | **Y** | **Z** |
| --- | --- | --- | --- | --- | --- | --- | --- | --- | --- |
| **K+(GLY)** | C | -1.97415 | -0.79585 | -0.13318 | **K+(GLY)** | C | -1.70871 | -0.60320 | -0.93359 |
| **M6[CO]** | C | -0.71546 | 0.05962 | 0.01007 | **M7[N]** | C | -0.33599 | -0.70085 | -0.27638 |
|  | N | -3.15977 | 0.05399 | 0.00929 |  | N | 0.26712 | 0.62015 | -0.02137 |
|  | O | -0.94886 | 1.33843 | 0.22448 |  | O | -2.28619 | 0.44234 | -1.12300 |
|  | O | 0.42302 | -0.39217 | -0.06579 |  | O | -2.18664 | -1.81720 | -1.25306 |
|  | H | -1.92592 | -1.58639 | 0.62791 |  | H | 0.41981 | 1.06573 | -0.92877 |
|  | H | -1.92602 | -1.29519 | -1.11036 |  | H | -0.46531 | 1.20632 | 0.38821 |
|  | H | -3.74231 | -0.20974 | 0.79753 |  | H | 0.32411 | -1.30246 | -0.91489 |
|  | H | -3.74228 | 0.06180 | -0.82189 |  | H | -0.45490 | -1.25159 | 0.66784 |
|  | H | -1.94789 | 1.40471 | 0.23569 |  | H | -3.06845 | -1.71015 | -1.65005 |
|  | K | 2.93406 | -0.10031 | -0.01709 |  | K | 2.60136 | 0.86707 | 1.51871 |

| **Complex** | **Atom** | **X** | **Y** | **Z** |  | **Atom** | **X** | **Y** | **Z** |
| --- | --- | --- | --- | --- | --- | --- | --- | --- | --- |
| **K+(GLY)** | C | 0.79088 | -0.35514 | -0.02402 | **K+(GLY)** | C | -2.20196 | 0.56624 | -0.10592 |
| **M8[CO]** | C | 1.67892 | 0.86050 | -0.26802 | **M9[CO,OH]** | C | -0.68361 | 0.73642 | -0.13664 |
|  | N | 3.10379 | 0.68866 | -0.37684 |  | N | -2.71469 | -0.75425 | 0.14230 |
|  | O | -0.43459 | -0.28807 | 0.07910 |  | O | -0.20850 | 1.97212 | -0.36523 |
|  | O | 1.44900 | -1.50616 | 0.07003 |  | O | 0.12061 | -0.16754 | 0.03046 |
|  | H | 3.52565 | 0.31649 | 0.46820 |  | H | -2.58795 | 0.93543 | -1.07078 |
|  | H | 3.37531 | 0.09946 | -1.15767 |  | H | -2.59020 | 1.26108 | 0.65739 |
|  | H | 1.44958 | 1.56478 | 0.54710 |  | H | -2.44408 | -1.11831 | 1.05048 |
|  | H | 1.28964 | 1.33452 | -1.18278 |  | H | -2.44207 | -1.42376 | -0.57042 |
|  | H | 0.81799 | -2.22994 | 0.22479 |  | H | -0.92114 | 2.62044 | -0.48356 |
|  | K | -2.90099 | 0.28504 | 0.22618 |  | K | 2.52657 | -1.01304 | 0.18707 |
